# Supplementary material
Source: PubMed Central journal article supplement (PMC4406820)
Supplement: NIHMS665820-supplement-2.pdf [file NIHMS665820-supplement-2.pdf]

# SUPPLEMENTAL MATERIAL

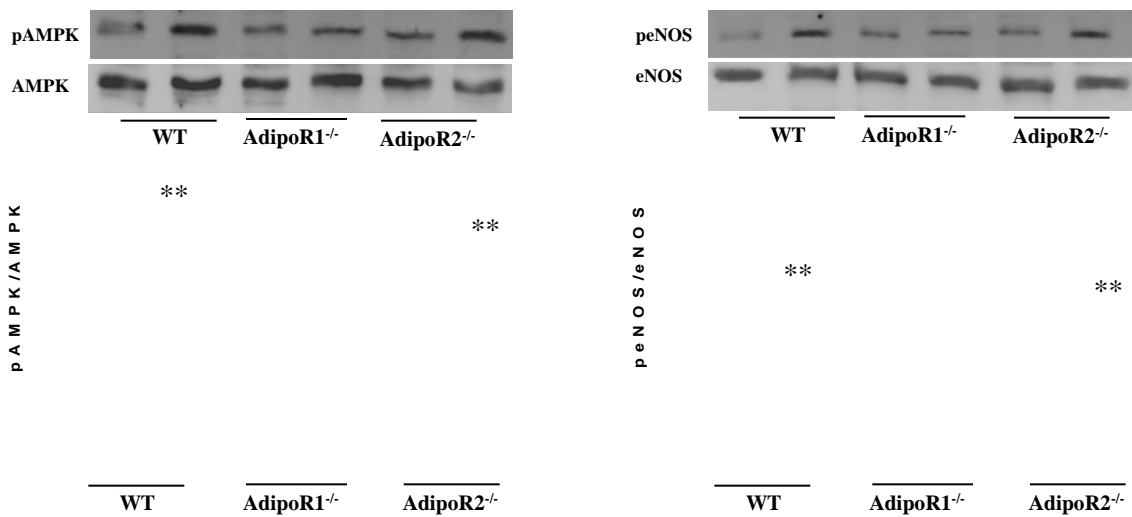

**Figure S1.** Cardiomyocytes from WT, AdipoR1<sup>-/-</sup> and AdipoR2<sup>-/-</sup> mice were treated with APN (2 µg/ml) for 30 min. AMPK and eNOS phosphorylation was determined by Western blot. N=10-12 wells/group from at least 3 mice. \*\*P<0.01 vs. vehicle.
